# Supplementary material for: Rational design of ZSM-5 zeolite containing a high concentration of single Fe sites capable of catalyzing the partial oxidation of methane with high turnover frequency
Source: Royal Society of Chemistry journal article supplement (doi:10.1039/d1cy01987b), 2021-12-01
Supplement: d1cy01987b1.pdf [file d1cy01987b1.pdf]

Supporting Information

## **Rational design of ZSM-5 zeolite containing a high concentration of single Fe sites capable of catalyzing the partial oxidation of methane with high turnover frequency**

Akira Oda,<sup>\*, a, b</sup> Koshiro Aono,<sup>a</sup> Naoya Murata,<sup>a</sup> Kazumasa Murata,<sup>a</sup> Masazumi Yasumoto,<sup>c</sup> Nao Tsunoji,<sup>c</sup> Kyoichi Sawabe,<sup>a, b</sup> Atsushi Satsuma<sup>\*, a, b</sup>

<sup>a</sup>Department of Materials Chemistry, Graduate School of Engineering, Nagoya University, Nagoya 464-8603, Japan.

<sup>b</sup>Elements Strategy Initiative for Catalysts and Batteries (ESICB) Kyoto University, Kyoto 615-8520, Japan.

<sup>c</sup>Graduate School of Advanced Science and Engineering, Hiroshima University, Higashi-Hiroshima 739-8527, Japan

Corresponding Authors

\*Email: akira@chembio.nagoya-u.ac.jp (A. O.)

\*Email: satsuma@chembio.nagoya-u.ac.jp. (A. S.)

## 1. METHODS

### 1.1. Sample.

**1.1.1. Commercial ZSM-5.** Commercial ZSM-5 zeolites purchased from TOSOH (NH<sub>4</sub><sup>+</sup>-form, Si/Al= 12.4, 820NHA; NH<sub>4</sub><sup>+</sup>-form, Si/Al= 22.0, 840NHA) and supplied by Catalysis Society of Japan (H<sup>+</sup>-form, Si/Al= 50.3, JRC-Z5-90H) were used as the supports to investigate the effect of the Si:Al ratio on the catalytic performance of the Fe/ZSM-5 catalysts. The accurate Si:Al ratios were determined by inductively coupled plasma atomic emission spectroscopy (ICP-AES). The detail was described in 1.1.7. The obtained values were adopted in this paper.

**1.1.2. Dealuminated ZSM-5.** Dealuminated ZSM-5 with the Si:Al ratio of 19.6 was obtained from the harsh acid treatments of the Al-rich ZSM-5 (TOSOH, 820NHA, Si/Al= 12.4).<sup>1</sup> 5.0 g of the Al-rich ZSM-5 zeolite was added to 6.0 M HNO<sub>3</sub> aqueous solution in a 300 cm<sup>3</sup> Teflon-lined stainless-steel autoclave. The sealed autoclave was heated at 160 °C for 24 h under tumbling conditions (20 rpm) using the hydrothermal synthesis reactor developed by HIRO COMPANY. The calcined sample was ion-exchanged with 1.0 M NH<sub>4</sub>(NO<sub>3</sub>) aqueous solution at 80 °C for 1 hour. After the ion-exchange, the sample was well rinsed with the distilled water. This ion-exchange was repeated three times. The resulting sample was dried under vacuum at room temperature overnight. The obtained NH<sub>4</sub><sup>+</sup>-form zeolite was used for preparations of the Fe ion-exchanged zeolites as the catalyst for partial oxidation of CH<sub>4</sub>.

**1.1.3. Hydrothermal synthesis of ZSM-5.** ZSM-5 with the Si:Al ratio of about 20 were hydrothermally synthesized through the previously reported procedures with slight modifications.<sup>2</sup> An aqueous solution of tetrapropylammonium hydroxide (TPAOH, TCI, 22.5wt%), Colloidal silica (Ludox HS-40, Sigma-Aldrich), aluminum nitrate nonahydrate (Wako, 98%), and sodium chloride (NaCl, Kanto chemical, 99.5%) were used as organic structure-directing agent (SDA), silica, Al, and Na sources, respectively. Two types of the starting mixtures were prepared with a molar composition of 1.0 SiO<sub>2</sub>: 0.02 Al<sub>2</sub>O<sub>3</sub>: 0.25 TPAOH: 0.1 NaCl: 25 H<sub>2</sub>O and 1.0 SiO<sub>2</sub>: 0.02 Al<sub>2</sub>O<sub>3</sub>: 0.5 TPAOH: 25 H<sub>2</sub>O. The difference between them is whether Na<sup>+</sup> contains or not. The 0.5 wt% (SiO<sub>2</sub> base) of calcined silicate-1 was added to the starting gel as a seed crystal to promote the crystallization. The hydrothermal synthesis was conducted at 170 °C for 24 h at 30 rpm using a 100 cm<sup>3</sup> Teflon-lined stainless steel autoclave (stirring-type hydrothermal synthesis reactor, R-100, Hiro Company, Japan). After crystallization, the solid product was collected by centrifugation, washed thoroughly with distilled water until nearly neutral, and dried at 343 K overnight. As prepared samples were calcined under air at 550 °C for 10 h to remove the organic SDA. The calcined samples were ion-exchanged with 1.0 M NH<sub>4</sub>(NO<sub>3</sub>) aqueous solution at 60 °C for 120 minutes. The ion-exchange treatment was repeated three times, and the resulting samples were well rinsed with the distilled water, and subsequently dried at 343 K overnight.

**1.1.4. Hydrothermal synthesis of silicate-1.** Silicate-1 was hydrothermally synthesized through the following procedure. First, 0.83 g NaOH and 52.06 g of 22.5 wt% tetrapropylammonium hydroxide (TPAOH: 20-25%, TCI) aqueous solution were added to 72.39 ml of distilled water in a 300-ml Teflon beaker, and the mixture was well stirred for 10 min at ambient condition. Next, 31.7 g colloidal silica was loaded into the mixture with vigorous stirring for 1 h. The synthesis solution was then transferred to a 300-ml Teflon-line stainless steel autoclave, and placed in a convection oven at 170 °C, and rotated at 15 rpm for 1 day. The sample was cooled to room temperature (RT) and collected by filtration. The sample was well rinsed and subsequently dried overnight at 80 °C. To remove the structure-directing agent, the as-synthesized zeolite was calcined in air at 500 °C overnight.

**1.1.5. Preparation of iron ion-exchanged ZSM-5.** 0.4–2.0 g of NH<sub>4</sub><sup>+</sup>-ion-exchanged ZSM-5 was dispersed in distilled water of 10–50 ml containing 0.001 or 0.1 M of FeSO<sub>4</sub>•7H<sub>2</sub>O (99.0-102.0%: Kishida) and 1.0 M of ascorbic acid (99.6%, Wako) at 80 °C for 1 h. After this, the sample was collected by centrifugation (6000 rpm) for 10 minutes, and the sample was collected. If necessary, the collected sample was re-dispersed in the Fe precursor aqueous solution containing the ascorbic acid, and the ion-exchange process was further conducted. For the rinse, the ion-exchanged sample was dispersed in 100 ml distilled water at room temperature and well mixed for 1 minute. The sample was collected by centrifugation (6000 rpm) for 10 minutes. The rinse procedures were repeated 6 times. The well-rinsed sample was dried overnight at room temperature under vacuum conditions. The samples were calcined at 500 °C for 3 h (2 °C /min) under the 10% H<sub>2</sub> and N<sub>2</sub> gas mixture flow with 100 ml min<sup>-1</sup>. This reductive calcination allowed us to activate the catalyst while suppressing the aggregation of the Fe species with the generation of the bulk Fe<sub>x</sub>O<sub>y</sub> facilitating the undesirable side-reaction, i.e., H<sub>2</sub>O<sub>2</sub> decomposition.<sup>4,6</sup>

When the Fe ion exchange operation was performed on Al-free ZSM-5 (Silicate) for 6-hour, the negligible Fe loading (< 0.01 wt%) was confirmed. This is indicative that our Fe modification approach effectively leads to the Fe ion-exchange on the framework AlO<sub>4</sub> tetrahedra site, while suppressing the undesirable fixation of the Fe species on the outer surface of ZSM-5.

**1.1.6. Preparation of iron impregnated ZSM-5 and silicate-1.** 0.5 g of NH<sub>4</sub><sup>+</sup> ion-exchanged ZSM-5 with the Si:Al ratio of 22.0 or ZSM-5 silicate-1 were dispersed in distilled water of 50 ml containing 0.1 M of FeSO<sub>4</sub>•7H<sub>2</sub>O (responsible for 0.44 wt% Fe loading) at 80 °C for 1 h. After this, the solvent was evaporated at 60 °C, through which the samples were collected. The collected samples were dried at room temperature under a vacuum overnight and subsequently calcined at 500 °C for 3 h (2 °C /min) under the 10% H<sub>2</sub> and N<sub>2</sub> gas mixture flow with 100 ml min<sup>-1</sup>.

Compared to the Fe/ZSM-5 catalysts obtained by the ion-exchange method, the Fe/ZSM-5 catalysts obtained through the impregnation method showed by far the lowest activity (**Table S4**). There is no doubt that it is

important to apply Fe ion exchange in designing the high-performance catalyst. Therefore, in this study, we focus only on the ion-exchange approach.

**1.1.7. Determination of iron loading.** 5.0 ml of 47% hydrogen fluoride (HF: 46-48%, Wako) aqueous solution was added to the Fe/ZSM-5 catalyst containing Teflon bottle, where the zeolite was rapidly dissolved in the HF aqueous solution. The resulting solution was diluted to 50 mL using 0.85 M H<sub>3</sub>BO<sub>3</sub> (99.5%, Wako) aqueous solution for converting the harmful HF to harmless HBF<sub>4</sub>. The Fe content was evaluated by ICP-AES for the samples dissolved in HF aqueous solution, through which the Fe loading was calculated.

## **1.2. Catalytic reactivity assay toward partial oxidation of methane.**

Catalytic reactivity assay was carried out based on the previously established procedures.<sup>3</sup> 27 or 3 mg of catalysts, 10 mL of 0.5 M H<sub>2</sub>O<sub>2</sub> (33-36%, Kishida) aqueous solution, and magnetic stirrer were placed in a glass vessel. It was placed in an autoclave and sealed. The reaction vessel volume was 37.36 mL. 0.8 MPa CH<sub>4</sub> gas was purged to the sealed reactor and flushed. This process was repeated five times. After the replacement of the air with CH<sub>4</sub>, the CH<sub>4</sub> pressure was regulated to 3.0 MPa. The reactivity assay was conducted at 50 °C for 30 minutes at 1500 rpm. After the reaction, the reactor was quickly cooled with the water bath containing the ice blocks. The liquid-phase products were extracted by the syringe filter, where the catalyst was fully separated. The 700 μL of the liquid phase product as well as the 100 μL D<sub>2</sub>O (99.9%, Wako) containing 0.02 wt% mol sodium trimethylsilylpropanesulfonate (Wako) as an internal standard were loaded to the NMR tube. The quantitative-qualitative analysis on the products was carried out the NMR measurements (Avance IIIHD, 500MHz, Bruker). The amount of unreacted H<sub>2</sub>O<sub>2</sub> was quantified by the titration method with 0.1 M Ce(SO<sub>4</sub>)<sub>2</sub> solution (Kishida), based on which the H<sub>2</sub>O<sub>2</sub> decomposition ratio in the reaction was evaluated.

## **1.3. Characterization.**

**1.3.1. <sup>27</sup>Al MAS NMR.** <sup>27</sup>Al magic angle spinning (MAS) NMR spectra of the NH<sub>4</sub><sup>+</sup>-ion-exchanged ZSM-5 catalysts were recorded at 156 MHz on a Varian 600PS solid NMR spectrometer. A 3.2 mm diameter zirconia rotor with a rotation speed of 15 kHz was selected. <sup>27</sup>Al MAS NMR spectra were acquired using 2.8 μs pulses, a 1 s recycle delay, and 256 scans. AlK(SO<sub>4</sub>)<sub>2</sub>·12H<sub>2</sub>O was used as a chemical shift reference. Samples were moisture equilibrated over a saturated solution of NH<sub>4</sub>Cl for 24 h prior to <sup>27</sup>Al MAS NMR measurements.

**1.3.2. SEM.** The crystal morphology was observed using a field-emission scanning electron microscope (FE-SEM; JSM-7500FA, JEOL).

**1.3.3. Ultra-violet, visible (UV-Vis) diffuse reflectance (DR) spectroscopy.** 10 mg of the sample was placed in an in-situ reflectance cell with a quartz window (JASCO Co., Ltd.). UV-Vis-NIR DR spectra were recorded using a JASCO V-770ICO spectrophotometer (JASCO Co., Ltd.) equipped with an integrating sphere

attachment and fiber optics. BaSO<sub>4</sub> was used as the reference material. The resolution and scan rate were set to 0.5 nm and 1000 nm min<sup>-1</sup>, respectively.

*1.3.4. X-ray absorption fine structure (XAFS) spectroscopy.* The Fe K-edge XAFS spectrum including the X-ray absorption near edge structure (XANES) in the fluorescence mode was collected at BL11S2 of Aichi Synchrotron Radiation Center, Aichi & Technology Foundation, which is equipped with a double crystal Si(311) monochromator. 60 mg of the Fe ZSM-5 with the Si:Al ratio of 22.0 and the Fe loading of 0.45 wt% was pressed into pellets with a 10 mm diameter. The data analysis was performed using the Athena software included in the Demeter package.

## 2. Supporting data.

**Table S1.** Comparison of the catalytic performances of the Fe/ZSM-5 catalysts with different Si:Al ratios.

This is related to **Figure 1** in the main text. Reaction conditions: 27 mg catalyst, 3.0 MPa CH<sub>4</sub>, 10 ml of 0.5 M H<sub>2</sub>O<sub>2</sub> aqueous solution, 0.5 h reaction time, 50 °C reaction temperature.

| Support       | Si:Al ratio | Fe loading (wt%) | Al content (wt%) | Catalyst amount (mg) | Yield (mmol)       |                     |       |      |       |
|---------------|-------------|------------------|------------------|----------------------|--------------------|---------------------|-------|------|-------|
|               |             |                  |                  |                      | CH <sub>3</sub> OH | CH <sub>3</sub> OOH | HCOOH | HCHO | Total |
| ZSM-5 (comm.) | 12.4        | 0.12             | 3.35             | 27                   | 0.00               | 0.01                | 0.00  | 0.01 | 0.03  |
| ZSM-5 (comm.) | 22.0        | 0.12             | 1.95             | 27                   | 0.01               | 0.02                | 0.20  | 0.04 | 0.27  |
| ZSM-5 (comm.) | 50.3        | 0.09             | 0.88             | 27                   | 0.01               | 0.01                | 0.17  | 0.03 | 0.21  |
| ZSM-5 (comm.) | 19.6        | 0.11             | 2.11             | 27                   | 0.01               | 0.017               | 0.21  | 0.03 | 0.26  |

**Table S2.** Comparison of the catalytic performances of the Fe/ZSM-5 catalysts with the different Fe loadings.

This is related to **Figure 2** in the main text. Reaction conditions: 27 or 3 mg catalyst, 3.0 MPa CH<sub>4</sub>, 10 ml of 0.5 M H<sub>2</sub>O<sub>2</sub> aqueous solution, 0.5 h reaction time, 50 °C reaction temperature.

| Support       | Si:Al ratio | Fe loading (wt%) | Al content (wt%) | Catalyst amount (mg) | Yield (mmol)       |                     |       |      |       |
|---------------|-------------|------------------|------------------|----------------------|--------------------|---------------------|-------|------|-------|
|               |             |                  |                  |                      | CH <sub>3</sub> OH | CH <sub>3</sub> OOH | HCOOH | HCHO | Total |
| ZSM-5 (comm.) | 22.0        | 0.02             | 1.95             | 27                   | 0.00               | 0.01                | 0.00  | 0.00 | 0.02  |
| ZSM-5 (comm.) | 22.0        | 0.12             | 1.95             | 27                   | 0.01               | 0.02                | 0.20  | 0.04 | 0.27  |
| ZSM-5 (comm.) | 22.0        | 0.23             | 1.95             | 27                   | 0.01               | 0.01                | 0.33  | 0.02 | 0.37  |
| ZSM-5 (comm.) | 22.0        | 0.35             | 1.95             | 27                   | 0.01               | 0.01                | 0.43  | 0.04 | 0.49  |
| ZSM-5 (comm.) | 22.0        | 0.43             | 1.95             | 27                   | 0.01               | 0.01                | 0.56  | 0.03 | 0.60  |
| ZSM-5 (comm.) | 22.0        | 0.45             | 1.95             | 27                   | 0.01               | 0.01                | 0.56  | 0.03 | 0.60  |
| ZSM-5 (comm.) | 22.0        | 0.45             | 1.95             | 3                    | 0.01               | 0.02                | 0.05  | 0.02 | 0.10  |

**Table S3.** Comparison of the catalytic performances of the Fe/ZSM-5(TPA) and Fe/ZSM-5(TPA,Na) catalysts with different Fe loadings. This is related to **Figure 6A** in the main text. Reaction conditions: 27 or 3 mg catalyst, 3.0 MPa CH<sub>4</sub>, 10 ml of 0.5 M H<sub>2</sub>O<sub>2</sub> aqueous solution, 0.5 h reaction time, 50 °C reaction temperature.

| Support       | Si:Al ratio | Fe loading (wt%) | Al content (wt%) | Catalyst amount (mg) | Yield (mmol)       |                     |       |      |       |
|---------------|-------------|------------------|------------------|----------------------|--------------------|---------------------|-------|------|-------|
|               |             |                  |                  |                      | CH <sub>3</sub> OH | CH <sub>3</sub> OOH | HCOOH | HCHO | Total |
| ZSM-5 (comm.) | 22.0        | 0.12             | 1.95             | 27                   | 0.01               | 0.02                | 0.20  | 0.04 | 0.27  |
| ZSM-5 (comm.) | 22.0        | 0.45             | 1.95             | 3                    | 0.01               | 0.02                | 0.05  | 0.02 | 0.10  |
| ZSM-5(TPA,Na) | 25.8        | 0.14             | 1.68             | 27                   | 0.01               | 0.01                | 0.31  | 0.02 | 0.35  |
| ZSM-5(TPA)    | 23.4        | 0.46             | 1.86             | 3                    | 0.01               | 0.01                | 0.13  | 0.03 | 0.19  |
| ZSM-5(TPA)    | 23.4        | 1.11             | 1.86             | 3                    | 0.02               | 0.01                | 0.24  | 0.03 | 0.30  |

**Table S4.** Comparison of the catalytic performances of Fe/ZSM-5(comm) prepared by the ion-exchange and impregnation methods, and Fe/Silicate-1. Reaction conditions: 27 mg catalyst, 3.0 MPa CH<sub>4</sub>, 10 ml of 0.5 M H<sub>2</sub>O<sub>2</sub> aqueous solution, 0.5 h reaction time, 50 °C reaction temperature.

| Support       | Si:Al ratio | Fe-fabrication approach | Fe loading (wt%) | Al content (wt%) | Catalyst amount (mg) | Yield (mmol)       |                     |       |      |       |
|---------------|-------------|-------------------------|------------------|------------------|----------------------|--------------------|---------------------|-------|------|-------|
|               |             |                         |                  |                  |                      | CH <sub>3</sub> OH | CH <sub>3</sub> OOH | HCOOH | HCHO | Total |
| ZSM-5 (comm.) | 22.0        | Ion-exchange            | 0.45             | 1.95             | 27                   | 0.01               | 0.01                | 0.56  | 0.03 | 0.60  |
| ZSM-5 (comm.) | 22.0        | impregnation            | 0.44             | 1.95             | 27                   | 0.02               | 0.02                | 0.24  | 0.03 | 0.30  |
| Silicate-1    | ∞           | impregnation            | 0.44             | 0                | 27                   | 0.00               | 0.00                | 0.00  | 0.00 | 0.00  |

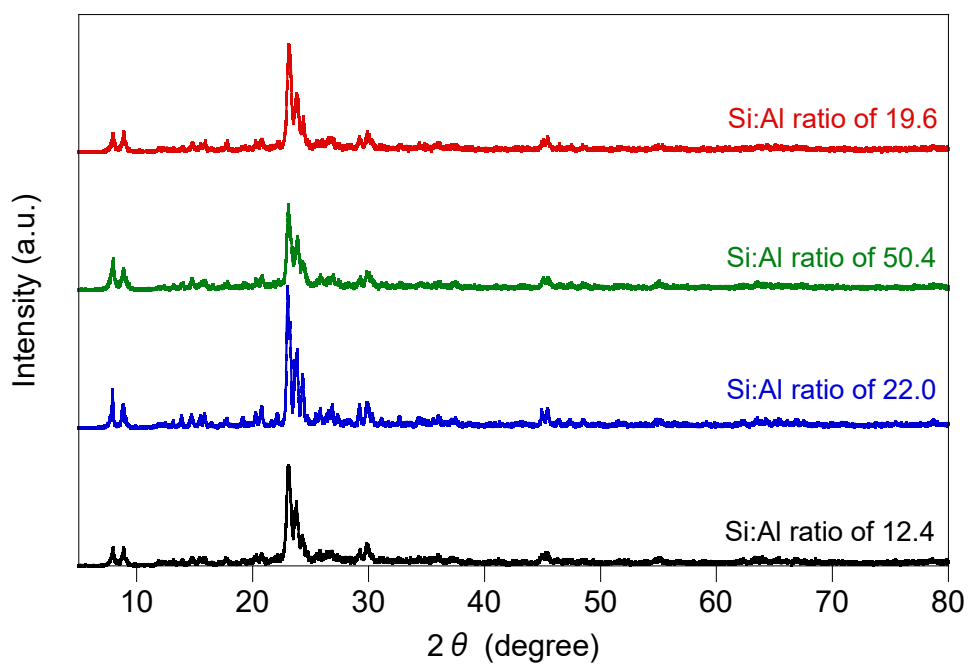

**Figure S1.** XRD profiles of commercial ZSM-5 zeolites with the Si:Al ratios of 12.4, 22.0, 50.3, and 19.6.

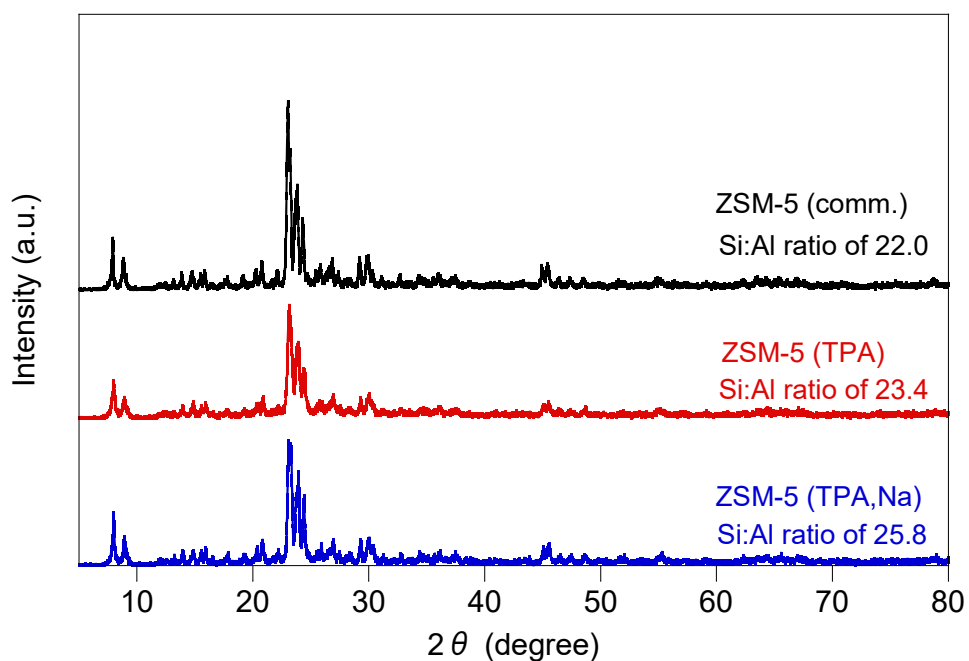

**Figure S2.** XRD profiles of ZSM-5(comm.), ZSM-5(TPA), and ZSM-5(TPA,Na).



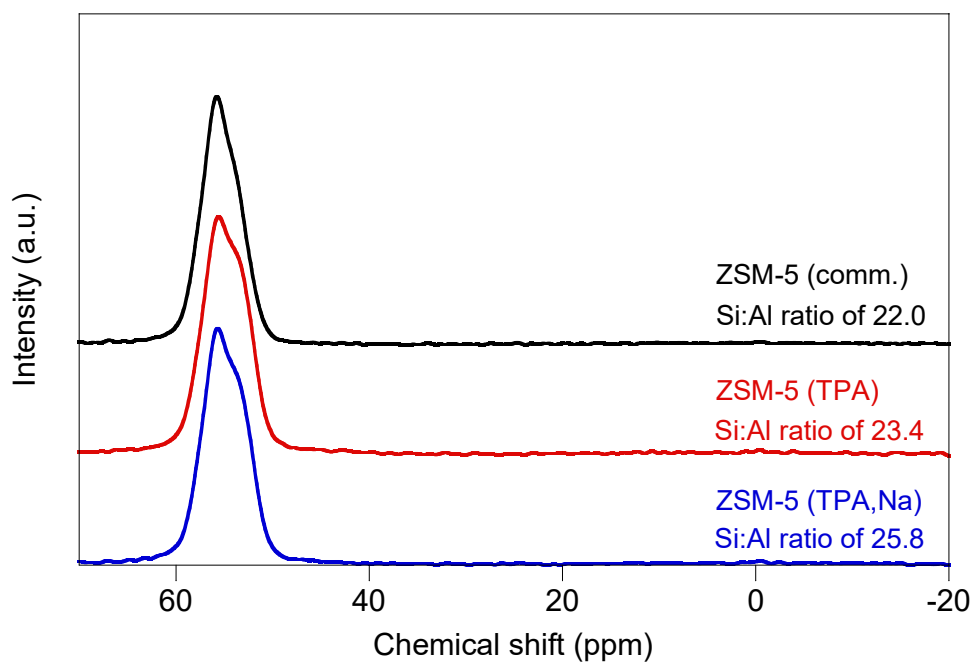

**Figure S3.**  $^{27}\text{Al}$  NMR of ZSM-5(comm.), ZSM-(TPA), and ZSM-5(TPA,Na).

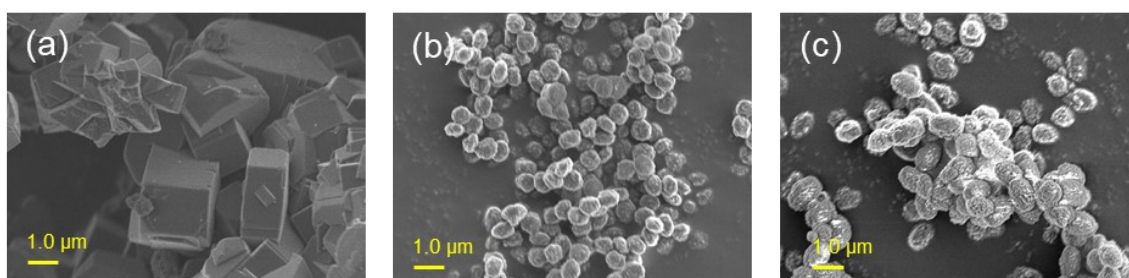

**Figure S4.** SEM images of (a) ZSM-5(comm.), (b) ZSM-(TPA), and (c) ZSM-5(TPA,Na).

### 3. Supporting references

1. S. Inagaki, S. Shinoda, Y. Kaneko, K. Takechi, R. Komatsu, Y. Tsuboi, H. Yamazaki, J. N. Kondo, Y. Kubota, *ACS Catal.* 2013, **3**, 74.
2. T. Yokoi, H. Mochizuki, T. Biligetu, Y. Wang, T. Tatsumi, *Chem. Lett.* 2017, **46**, 798.
3. C. Hammond, R. L. Jenkins, N. Dimitratos, J. A. Lopez-Sanchez, M. H. Ab Rahim, M. M. Forde, A. Thetford, D. M. Murphy, H. Hagen, E. E. Stangland, *Chem.–A Eur. J.* 2012, **18**, 15735.
4. C. Hammond, N. Dimitratos, R. L. Jenkins, J. A. Lopez-Sanchez, S. A. Kondrat, M. Hasbi ab Rahim, M. M. Forde, A. Thetford, S. H. Taylor, H. Hagen, *ACS Catal.* 2013, **3**, 689.
5. M. M. Forde, R. D. Armstrong, R. McVicker, P. P. Wells, N. Dimitratos, Q. He, L. Lu, R. L. Jenkins, C. Hammond, J. A. Lopez-Sanchez, *Chem. Sci.* 2014, **5**, 3603-3616.
6. Z. Fang, H. Murayama, Q. Zhao, B. Liu, F. Jiang, Y. Xu, M. Tokunaga, X. Liu, *Catal. Sci. Technol.* 2019, **9**, 6946.
